# Supplementary material
Source: Springer Nature journal article supplement (https://www.springermedizin.de/resource/supplementary/12963_2011_185_MOESM2_ESM.pdf/9572316)

Scenario A: Complete Missingness

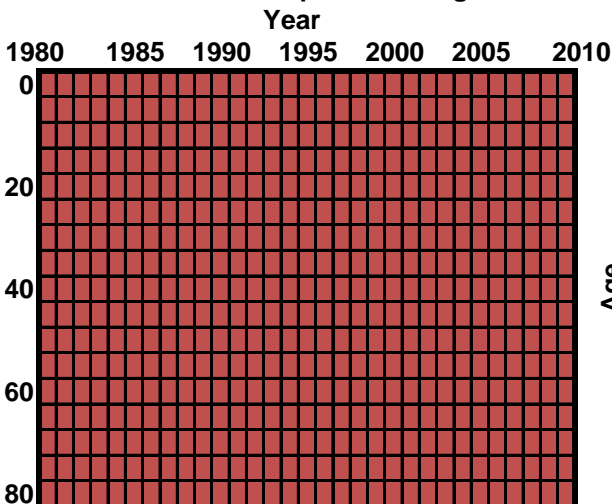

Scenario D: Missingness at End of Sequence

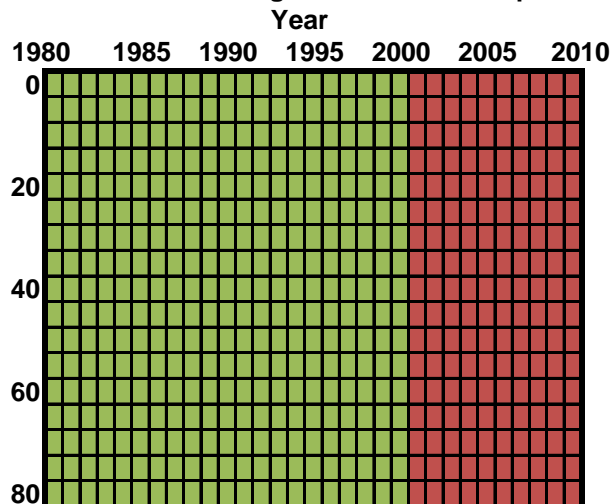

Scenario B: Missingness in Middle of Sequence

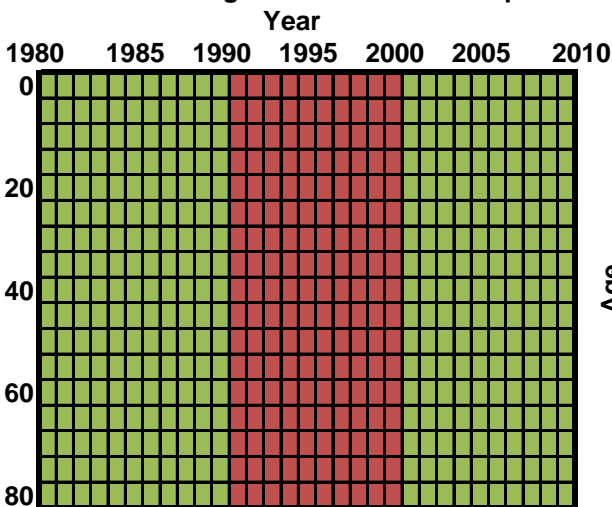

Scenario E: Missingness in Some Age Groups

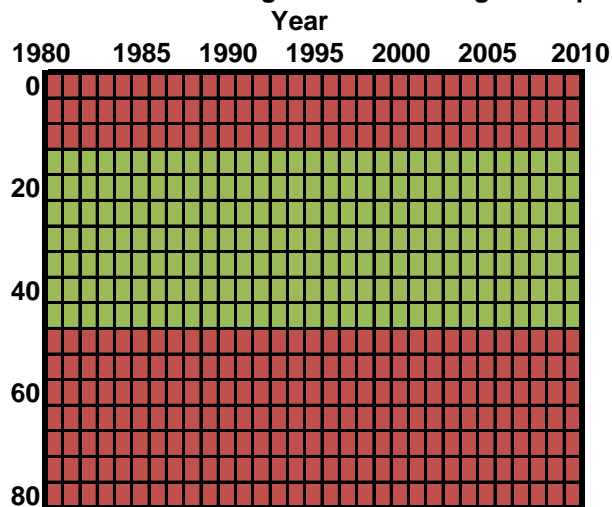

Scenario C: Missingness at Beginning of Sequence

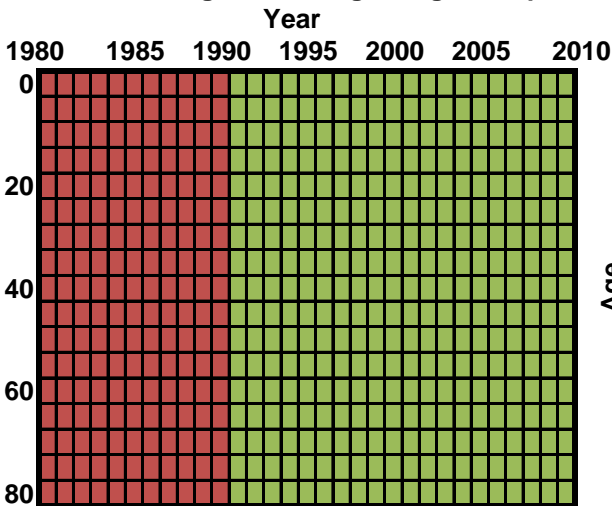

Combination of Scenarios

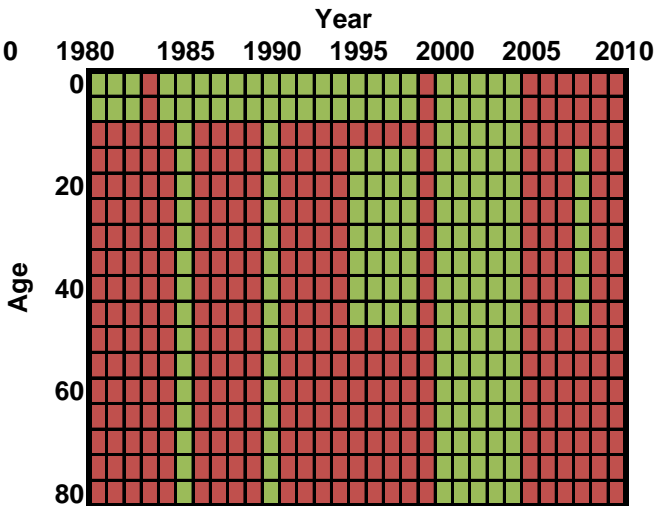

Supplement: MOESM2 [file 9572316]
